# Supplementary material
Source: PubMed Central journal article supplement (PMC4330586)
Supplement: supp_tpc.114.134486_tpc134486_Supplemental.pdf [file supp_tpc.114.134486_tpc134486_Supplemental.pdf]

## SUPPLEMENTAL DATA

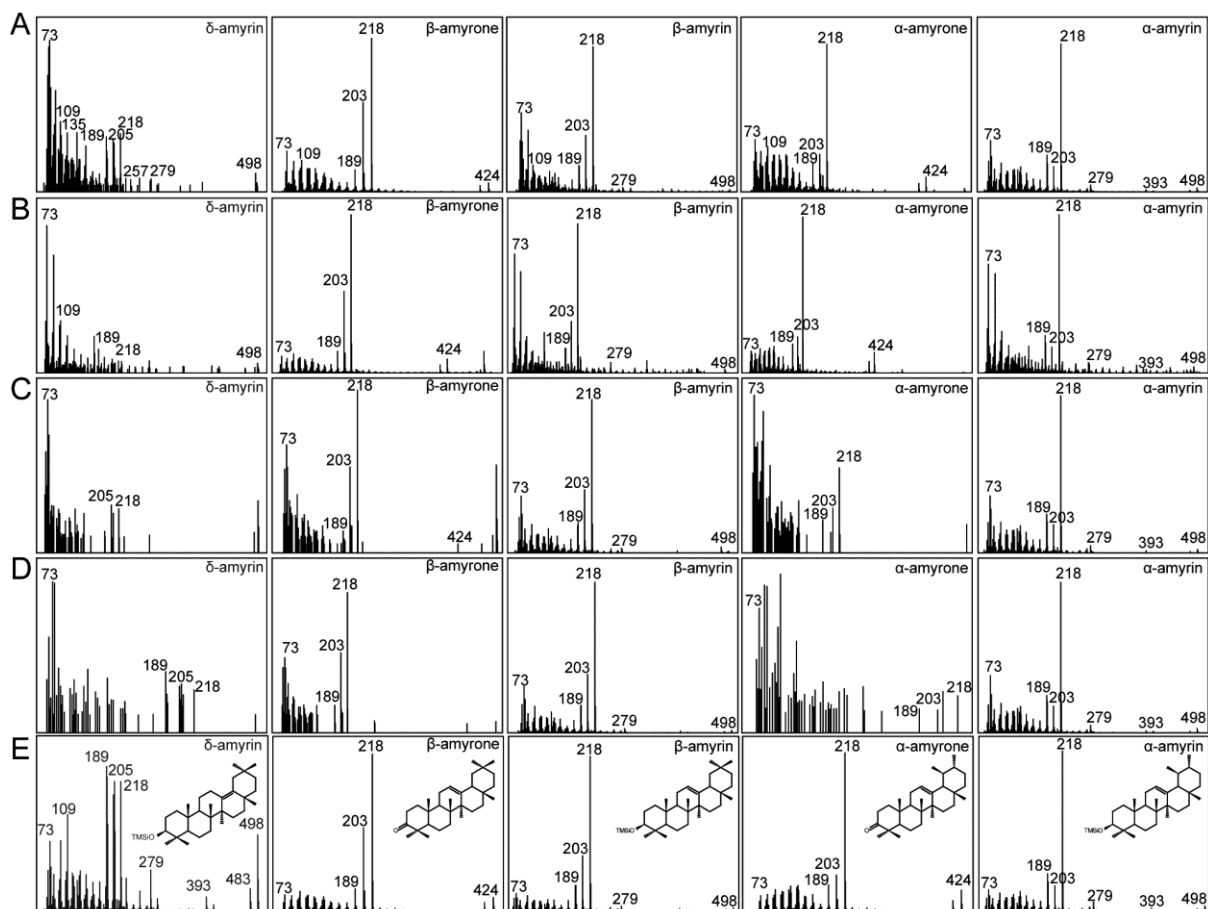

**Supplemental Figure 1.** Identity of *A. annua* triterpenoids. EI-MS data for the triterpenes and triterpenoids inherent to *A. annua* flower buds (**A,B**) and leaves (**C,D**) from the Anamed A3 (**A,C**) and Meise (**B,D**) cultivars. The peaks corresponding to these EI-MS are given in Figure 4. (**E**) EI-MS and structures of authentic trimethylsilylated  $\delta$ -amyrin,  $\beta$ -amyrin and  $\alpha$ -amyrin, and underivatized  $\beta$ -amyronone and  $\alpha$ -amyronone.

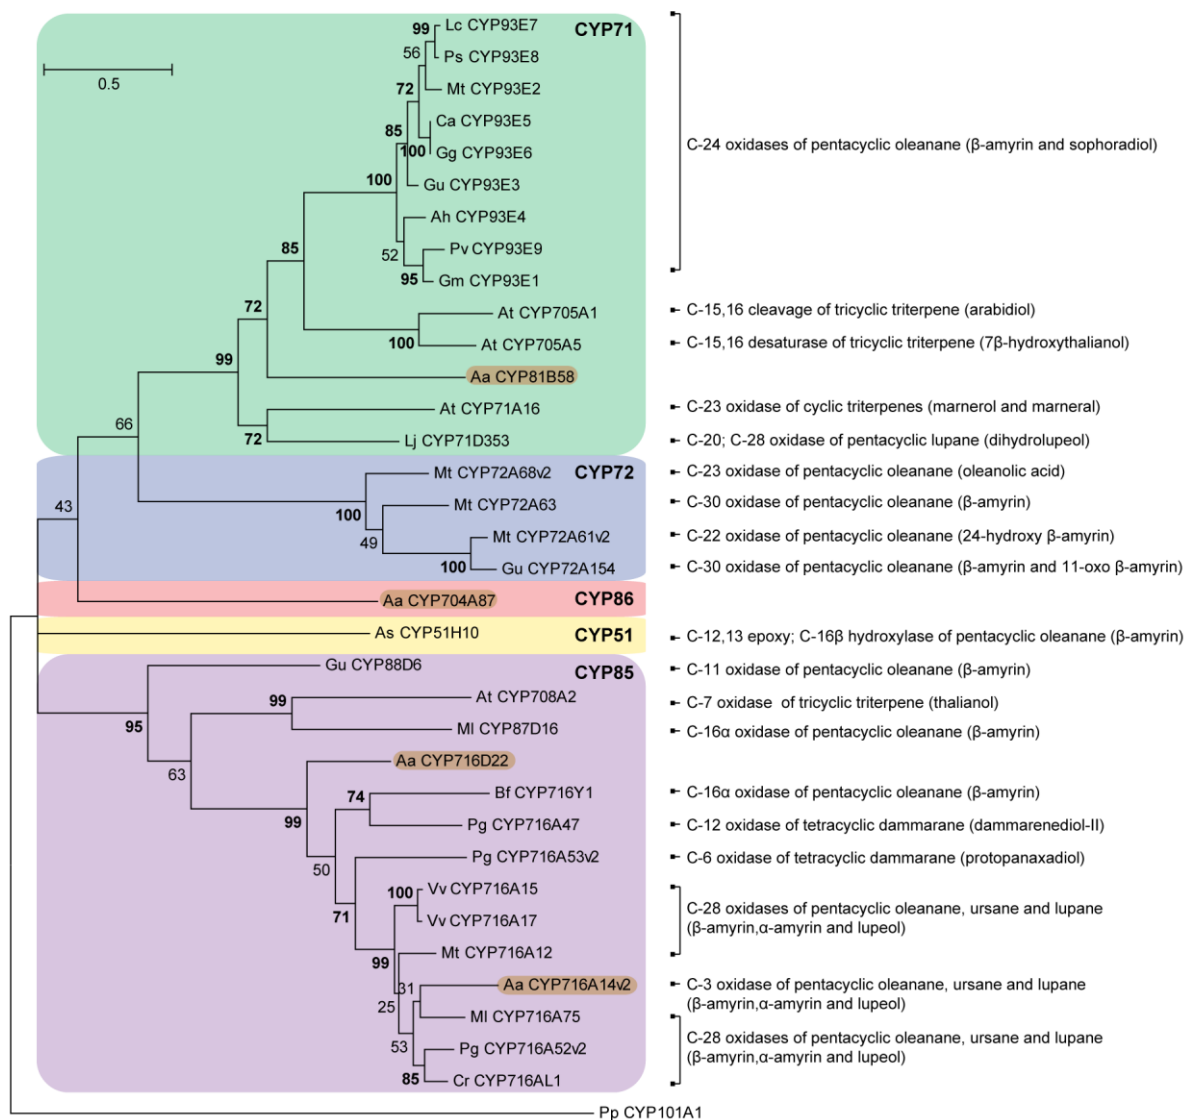

**Supplemental Figure 2.** Phylogenetic analysis of *A. annua* candidate P450s and other P450s involved in specialized triterpenoid biosynthesis. CYP716D22, CYP716A14v2, CYP704A87, CYP81B58 are highlighted in brown. The enzymatic activity of the P450s is indicated on the right. The percentage of replicate trees that clustered together in the bootstrap test is indicated on the branches. High scoring bootstrap values ( $\geq 70\%$ ) are highlighted in bold. The bacterial CYP101A1 is included as an outgroup. The P450 clan names are mentioned in bold and are color coded as green, CYP71 clan; blue, CYP72 clan; red, CYP86 clan; yellow, CYP51 clan; purple, CYP85 clan. The scale bar represents the number of amino acid substitutions per site. The amino acid sequences were retrieved from GenBank (<http://www.ncbi.nlm.nih.gov/genbank/>). Aa, *Artemisia annua*; Ah, *Arachis hypogaea*; As, *Avena strigosa*; At, *Arabidopsis thaliana*; Bf, *Bupleurum falcatum*; Ca, *Cicer arietinum*; Cr, *Catharanthus roseus*; Gg, *Glycyrrhiza glabra*; Gm, *Glycine max*; Gu, *Glycyrrhiza uralensis*; Lc, *Lens culinaris*; Lj, *Lotus japonicus*; Ml, *Maesa lanceolata*; Mt, *Medicago truncatula*; Pg, *Panax ginseng*; Pp, *Pseudomonas putida*; Ps, *Pisum sativum*; Pv, *Phaseolus vulgaris*; Vv, *Vitis vinifera*.

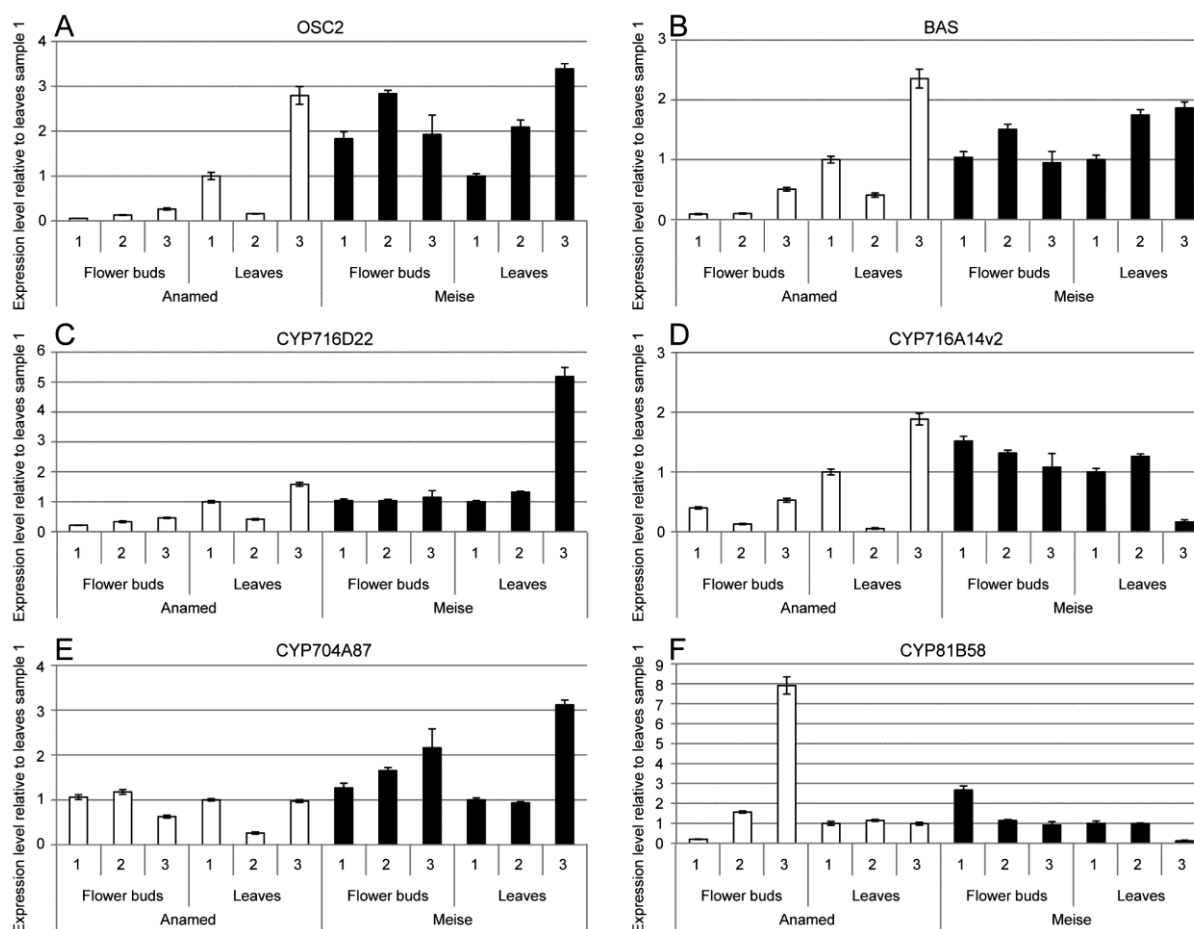

**Supplemental Figure 3.** Organ-specific expression of candidate OSC- and P450-family triterpene biosynthesis genes in *A. annua* cultivars. The organ-specific expression of the OSCs, OSC2 (**A**) and BAS (**B**), and candidate P450s, CYP716D22 (**C**), CYP716A14v2 (**D**), CYP704A87 (**E**) and CYP81B58 (**F**), were verified by quantitative real-time polymerase chain reaction (qPCR) in flower buds and leaves of Anamed A3 and Meise cultivars. Y-axis, expression levels relative to those in the flower buds. The labels 1 to 3 in the X-axis refer to the three biological repeats. Error bars are standard error of the mean for  $n = 3$ .

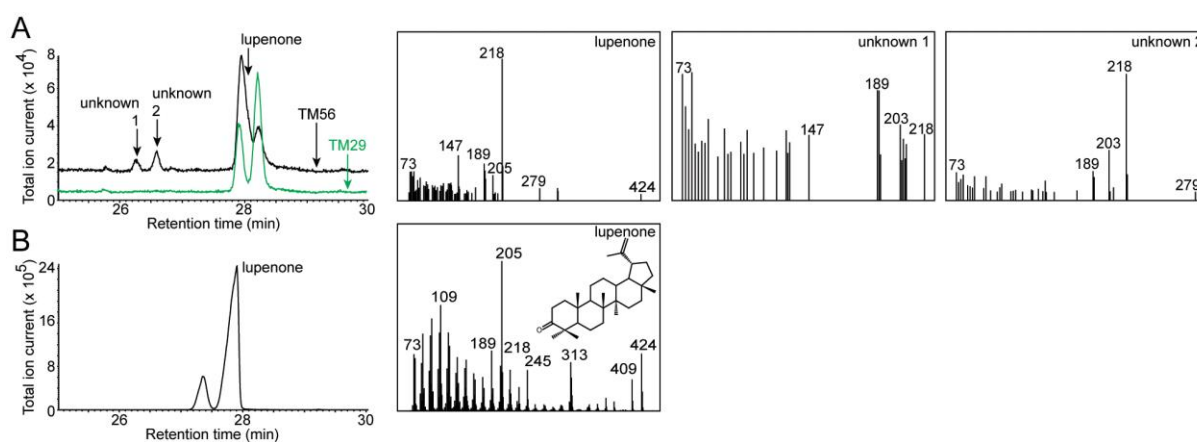

**Supplemental Figure 4.** CYP716A14v2 is a multifunctional P450. **(A)** Overlay of GC-MS chromatograms showing the oxidation of lupeol to lupeone and other compounds (unknown 1 and unknown 2) by CYP716A14v2 in the yeast strain TM56 (black), but not in the control yeast strain TM29 (green). **(B)** GC-MS chromatogram of an authentic standard of lupeone, the structure of which is depicted in the inset. Insets at the right show the EI-MS spectra of unknown 1, unknown 2 and lupeone. The GC retention times of unknown 1, unknown 2 and lupeone are 26.2 min, 26.6 min and 27.9 min, respectively.

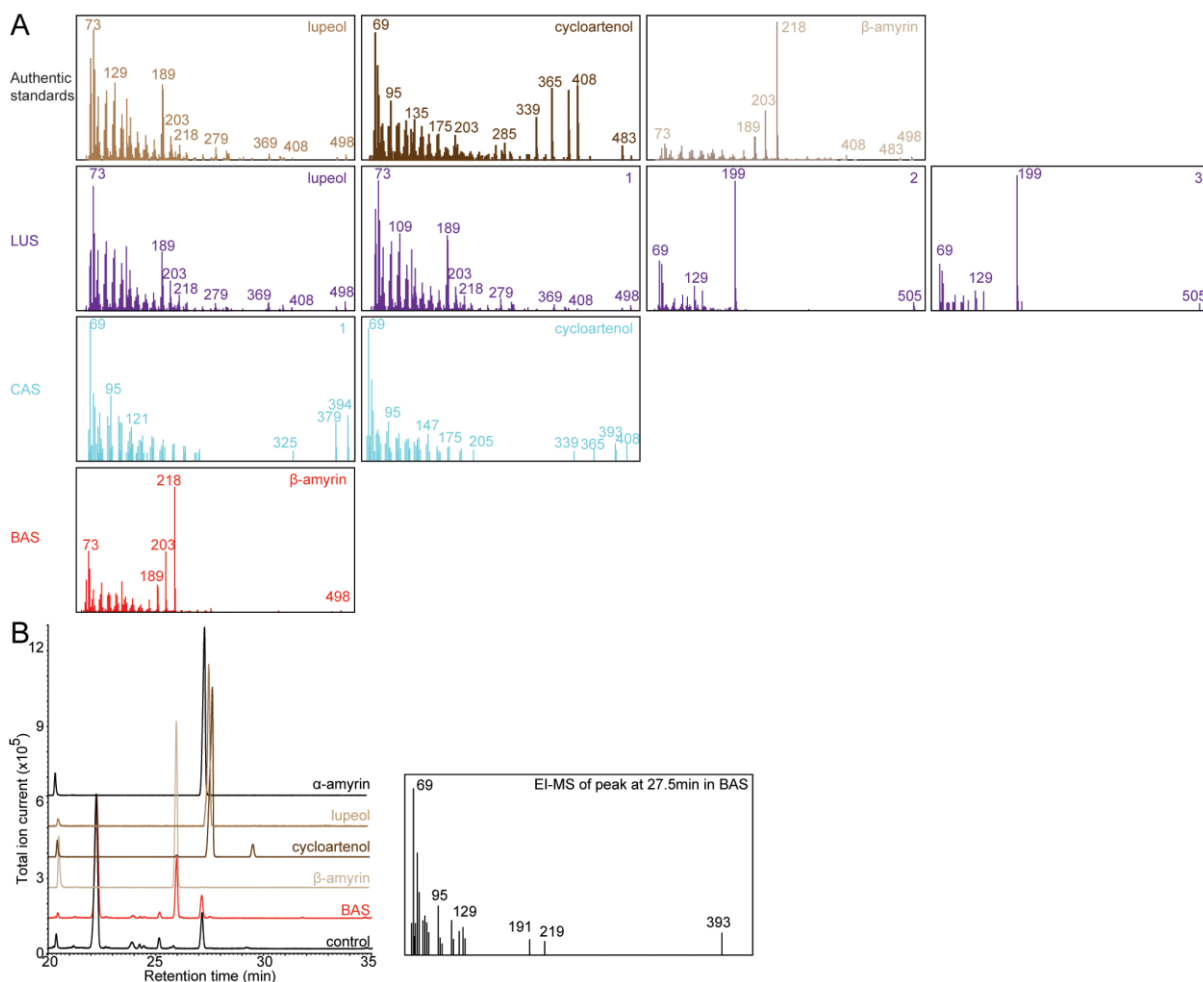

**Supplemental Figure 5.** Identification of the products of *A. annua* OSCs. **(A)** EI-MS spectra of new peaks and authentic standards in Figure 8. **(B)** Overlay of GC-MS chromatograms of authentic standards of  $\alpha$ -amyryn, lupeol, cycloartenol,  $\beta$ -amyryn, yeast strain TM106 expressing *BAS* (red), and control strain TM111 (black) showing the cyclization of 2,3-oxidosqualene by *BAS* to  $\beta$ -amyryn and trace amounts of a compound eluting at 27.5 min. The EI-MS spectra of the peak eluting at 27.5 min is shown as an inset on the right.

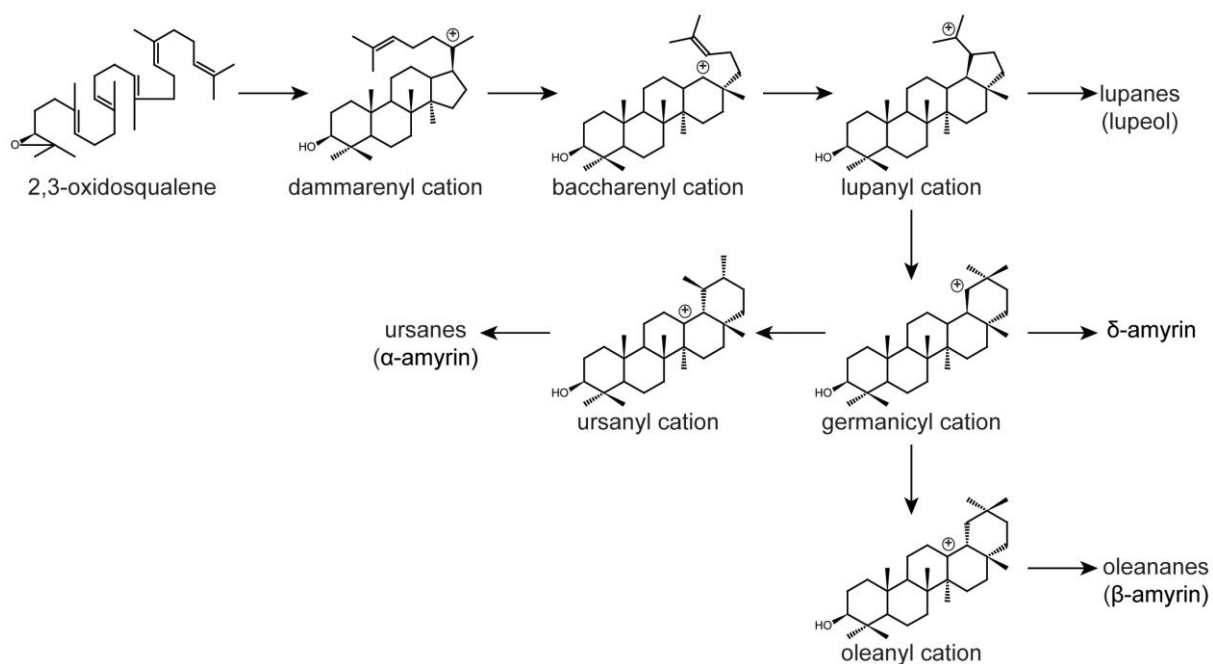

**Supplemental Figure S6.** Schematic of the 2,3-oxidosqualene cyclization cascade mediated by oxidosqualene cyclases to generate oleanane, ursane and lupane triterpene backbones.

**Supplemental Table 1.** RNA-Seq triterpene contig counts for glandular and filamentous trichomes.

| Gene name          | Representative Contig | Counts          | Counts          | Ratio FT/GT | p-value   |
|--------------------|-----------------------|-----------------|-----------------|-------------|-----------|
|                    |                       | FT <sup>1</sup> | GT <sup>1</sup> |             |           |
| <i>OSC2</i>        | <i>comp7642</i>       | 257.57          | 6.27            | 41.06       | 1.09 E-04 |
| <i>BAS</i>         | <i>comp33386</i>      | 147.15          | 2.04            | 72.16       | 1.92 E-01 |
| <i>CYP704A87</i>   | <i>comp8932</i>       | 62.45           | 0.00            | ∞           | 1.18 E-04 |
| <i>CYP81B58</i>    | <i>comp9232</i>       | 255.87          | 2.43            | 105.35      | 8.03 E-07 |
| <i>CYP716D22</i>   | <i>comp33076</i>      | 118.26          | 16.18           | 7.31        | 6.38 E-01 |
| <i>CYP716A14v2</i> | <i>comp11264</i>      | 461.97          | 24.16           | 19.12       | 3.01 E-01 |

<sup>1</sup>Sum of normalized counts from 6 samples of filamentous (FT) and glandular (GT) trichomes.

**Supplemental Table 2.** Yeast strains generated in this study.

| Strain              | Genotype                                                                  |
|---------------------|---------------------------------------------------------------------------|
| <i>S288c BY4742</i> | MATa <i>his3Δ1 leu2Δ0 ura3Δ0 lys2Δ0</i>                                   |
| TM1                 | <i>S288c BY4742</i> ; P <sub>erg7</sub> ::P <sub>MET3</sub> - <i>ERG7</i> |
| TM5                 | TM1; pESC-URA[ <i>GAL10/tHMG1</i> ]                                       |
| TM6                 | TM1; pESC-URA[ <i>GAL10/tHMG1</i> ; <i>GAL1/At-LUS1</i> ]                 |
| TM29                | TM6; pAG423, pAG415[ <i>GAL1/At-ATR1</i> ]                                |
| TM50                | TM1; pESC-URA[ <i>GAL10/tHMG1</i> ; <i>GAL1/OSC2</i> ]                    |
| TM51                | TM50; pAG423[ <i>GAL1/CYP716D22</i> ], pAG415[ <i>GAL1/At-ATR1</i> ]      |
| TM52                | TM50; pAG423[ <i>GAL1/CYP716A14v2</i> ], pAG415[ <i>GAL1/At-ATR1</i> ]    |
| TM53                | TM50; pAG423[ <i>GAL1/CYP704A87</i> ], pAG415[ <i>GAL1/At-ATR1</i> ]      |
| TM54                | TM50; pAG423[ <i>GAL1/CYP81B58</i> ], pAG415[ <i>GAL1/At-ATR1</i> ]       |
| TM55                | TM50; pAG423, pAG415[ <i>GAL1/At-ATR1</i> ]                               |
| TM56                | TM6; pAG423[ <i>GAL1/CYP716A14v2</i> ], pAG415[ <i>GAL1/At-ATR1</i> ]     |
| TM106               | TM5; pAG423[ <i>GAL1/BAS</i> ]                                            |
| TM107               | TM5; pAG423[ <i>GAL1/CAS</i> ]                                            |
| TM108               | TM5; pAG423[ <i>GAL1/LUS</i> ]                                            |
| TM109               | TM5; pAG423[ <i>GAL1/OSC2</i> ]                                           |
| TM110               | TM5; pAG423[ <i>GAL1/OSC3</i> ]                                           |
| TM111               | TM5; pAG423                                                               |



**Table S3.** Primers used for cloning.

| Primer No. | Sequence (5' to 3')                                             |
|------------|-----------------------------------------------------------------|
| P1         | GGGGACAAGTTTGTACAAAAAAGCAGGCTTAATGTGGAAGTTGAAGGTA               |
| P2         | GGGGACCACTTTGTACAAGAAAGCTGGGTATTATTTAGTTTTGACCCA                |
| P3         | GGGGACAAGTTTGTACAAAAAAGCAGGCTTActcgagATGTGGAAGTTGAAGGTAGC       |
| P4         | GGGGACCACTTTGTACAAGAAAGCTGGGTTgctagcTTATTTAGTTTTGACCCAAAC       |
| P5         | GGGGACAAGTTTGTACAAAAAAGCAGGCTTAATGATACAAGTTTTAACATC             |
| P6         | GGGGACCACTTTGTACAAGAAAGCTGGGTATCATACTTGATGAGGATGAAG             |
| P7         | GGGGACAAGTTTGTACAAAAAAGCAGGCTTAATGGTTGATCTCATTCTC               |
| P8         | GGGGACCACTTTGTACAAGAAAGCTGGGTATCAGGCATAACGAGGATA                |
| P9         | GGGGACAAGTTTGTACAAAAAAGCAGGCTTAATGAAGACCCCTTTCTTC               |
| P10        | GGGGACCACTTTGTACAAGAAAGCTGGGTATTAGAAGCGATGAAAAGC                |
| P11        | GGGGACAAGTTTGTACAAAAAAGCAGGCTTAATGGATACATTATATGTT               |
| P12        | GGGGACCACTTTGTACAAGAAAGCTGGGTATTACAGCTGAGATATTAA                |
| P13        | GGGGACAAGTTTGTACAAAAAAGCAGGCTTAGCCCGGGCATGTGGAGATTGAAAA<br>TAGC |
| P14        | GGGGACCACTTTGTACAAGAAAGCTGGGTTCTCGAGCTAGGTGCCTTTGAGCTGT<br>GG   |
| P15        | GGGGACAAGTTTGTACAAAAAAGCAGGCTTAATGTGGAATTGAAGATCGCAG            |
| P16        | GGGGACCACTTTGTACAAGAAAGCTGGGTATTAAGTTTCCACTTTAAGTAC             |
| P17        | GGGGACAAGTTTGTACAAAAAAGCAGGCTTAATGTGGAAGTTGAAGATAGCGG           |
| P18        | GGGGACCACTTTGTACAAGAAAGCTGGGTATTAGGTAGTGATCCCATCAC              |
| P19        | GGGGACAAGTTTGTACAAAAAAGCAGGCTTAATGTGGAGATTGAAAATAGCAG           |
| P20        | GGGGACCACTTTGTACAAGAAAGCTGGGTATTATGTATTGATTTGAACTCTTG           |
| P21        | GGGGACAAGTTTGTACAAAAAAGCAGGCTTAATAGCGAAGCAGTTCGTAAAGC           |
| P22        | GGGGACCACTTTGTACAAGAAAGCTGGGTAGATATTCTCCAAGTGCCCAAAG            |
| P23        | GGGGACAAGTTTGTACAAAAAAGCAGGCTTAGCAAATGCTTTGTGATGAAGAG           |
| P24        | GGGGACCACTTTGTACAAGAAAGCTGGGTACCAACCTTTTGAATGGAATAA             |

The sequences in lower case represent the restriction recognition sites used for restriction enzyme-mediated cloning.

**Table S4.** Primers used for qPCR analysis.

| Name               | Sequence (5' to 3')                           |
|--------------------|-----------------------------------------------|
| <i>OSC2</i>        | CGGTTCGAGCGTCAAGAAGTA<br>CGCATAAGCAAATCACCGCA |
| <i>BAS</i>         | GGTGGGTGGGGATTTACAT<br>CACGACCTTCCCCAAAAGA    |
| <i>CYP716D22</i>   | CTGCTGCGGCACATAAAGAC<br>GAGTTGGTCCTGCACCTTCA  |
| <i>CYP716A14v2</i> | AAGCTGACATCGCTGACGTA<br>TGCACATGTTGAGCTTGCAT  |
| <i>CYP704A87</i>   | AGCGGCTCTCAAGGAAAACA<br>AGCTGCTCCCTCTTGTTTCG  |
| <i>CYP81B58</i>    | AGGCACGACGGTTTAAGGAG<br>CTCCGATCCACTTCCACCAC  |
| <i>Actin</i>       | TCTCACAATTTCCCGCTCTG<br>CCACACGCCATCCTTCG     |
| <i>PP2AA3</i>      | GGGAAGTTGTTACAGCCCCA<br>TACCATATACCGCACACGCC  |
| <i>PPR</i>         | GGGAACTTAAGGTTGCGGT<br>ACCATCCCGAGAGTACCCAT   |
